# Supplementary material
Source: PubMed Central journal article supplement (PMC2533806)
Supplement: NIHMS63760-supplement-1si20071001_12.pdf [file NIHMS63760-supplement-1si20071001_12.pdf]

# Tailoring Relaxation Dispersion Experiments for Fast-Associating Protein Complexes

Kenji Sugase, Jonathan C. Lansing, H. Jane Dyson, and Peter E. Wright

## Supporting Information

### A. Sample preparation

Uniformly  $^{15}\text{N}$ -labeled C-terminal activation domain (residues 776-826) of human HIF-1 $\alpha$  was expressed as a GB1 fusion protein in BL21-DE3 cells in M9 minimal medium; complete and specific Asn803 hydroxylation was accomplished in *E. coli* by coexpression with human asparaginyl hydroxylase, the factor inhibiting HIF-1 (FIH). Following thrombin cleavage of the GB1 fusion protein, hydroxylated HIF (HIF-OH) was purified to homogeneity by reverse-phase HPLC. Unlabeled TAZ1 domain (residues 345-439) of mouse CBP was prepared as described.<sup>1</sup> The proteins were dissolved separately in NMR buffer [90%  $\text{H}_2\text{O}/10\% \text{D}_2\text{O}$ , 20 mM MES (pH 6.12), 2 mM dithiothreitol (DTT), 2 mM  $\text{NaN}_3$ ] and concentrated. NMR samples of the [ $^{15}\text{N}$ ]-HIF-OH:TAZ1 complex for the  $R_2$  dispersion experiments, in which HIF-OH concentration was kept at 510  $\mu\text{M}$  while the effective TAZ1 concentration was 26.9, 21.5, 16.1, or 10.8  $\mu\text{M}$ , were prepared from a single concentrated solution of each protein to make the concentration ratios accurate. The concentration of HIF-OH was determined from the absorbance at 280 nm, using an extinction coefficient of 1.4  $\text{mM}^{-1}\cdot\text{cm}^{-1}$ . The effective concentrations of TAZ1 were determined from fitting the dispersion data; TAZ1 refolding is technically difficult, and the effective concentrations of correctly folded protein are lower than determined from UV absorbance measurements.

### B. NMR measurements

$^1\text{H}$ - $^{15}\text{N}$  HSQC,<sup>2</sup>  $^{15}\text{N}$  TOCSY-HSQC and  $^{15}\text{N}$  NOESY-HSQC,<sup>3</sup> HNCA, HN(CO)CA, and HNCO,<sup>4</sup> (HCA)CO(CA)NH,<sup>5</sup> HNCACB<sup>6</sup> spectra were acquired at 25 °C on a Bruker DRX600 spectrometer for

chemical shift assignments.

$^{15}\text{N}$   $R_2$  relaxation rates were measured for the four [ $^{15}\text{N}$ ]-HIF-OH:TAZ1 samples on Bruker DRX600 and Avance900 spectrometers at 25 °C using relaxation-compensated constant-time Carr-Purcell-Meiboom-Gill (CPMG) pulse sequences.<sup>7,8</sup>  $R_2$  dispersion spectra were acquired as two-dimensional data sets with a constant relaxation delay of 40, 60 or 80 ms. Some data points (three to seven), including a reference spectrum acquired with the CPMG blocks omitted, were collected in duplicate and were used to estimate the absolute uncertainties and the signal-to-noise ratio of each spectrum.

A  $^1\text{H}$ - $^{15}\text{N}$  heteronuclear single quantum coherence (HSQC) titration was performed for 510  $\mu\text{M}$  [ $^{15}\text{N}$ ]-HIF-OH with unlabeled TAZ1 on a Bruker DRX600 spectrometer at 25 °C. The HIF-OH:TAZ1 concentration ratio ranged from 1:0 to 1:1.2 (Fig. S1). Exchange between the free and fully bound states is slow on the chemical shift time scale. However, very small shifts are observed for a subset of HIF-OH cross peaks upon addition of substoichiometric amounts of TAZ1; this exchange process is fast and does not contribute to  $R_2$  relaxation.

### **Fitting of $R_2$ dispersion profiles**

$^{15}\text{N}$   $R_2$  dispersion profiles of HIF-OH for all four samples at the two spectrometer frequencies (Fig. S3) were fit simultaneously for each residue using the program GLOVE as described previously.<sup>9,10</sup> The association and dissociation rate constants,  $k_{\text{on}}$  and  $k_{\text{off}}$ , were treated as global parameters for all residues in the C-terminal helix of HIF-OH. The data fitted well to a two-site exchange model. Fits to a three-site exchange model yielded physically unreasonable parameters and could not reproduce the macroscopic  $K_D$  measured by ITC.

An analytical equation derived by Carver and Richards was used:<sup>11</sup>

$$R_2^{\text{eff}} = R_2^0 + \frac{1}{2} \left\{ [\text{TAZ1}]k_{\text{on}} + k_{\text{off}} - \frac{1}{\tau_{\text{CP}}} \cosh^{-1} \left[ D_+ \cosh(\eta_+) - D_- \cos(\eta_-) \right] \right\}$$

$$D_{\pm} = \frac{1}{2} \left[ \pm 1 + \frac{\Psi + 2\Delta\omega_{\text{FB}}^2}{\sqrt{\Psi^2 + \xi^2}} \right]$$

$$\eta_{\pm} = \tau_{\text{CP}} \sqrt{\frac{1}{2} \left( \pm \Psi + \sqrt{\Psi^2 + \xi^2} \right)}$$

$$\Psi = ([\text{TAZ1}]k_{\text{on}} + k_{\text{off}})^2 - \Delta\omega_{\text{FB}}^2$$

$$\xi = 2\Delta\omega_{\text{FB}} ([\text{TAZ1}]k_{\text{on}} - k_{\text{off}}),$$

where fitting parameters are described in the main text. The free TAZ1 concentration, [TAZ1], can be calculated from the total concentrations [TAZ1]<sub>0</sub> and [HIF-OH]<sub>0</sub> and  $K_D (=k_{\text{off}}/k_{\text{on}})$ :

$$[\text{TAZ1}] = \frac{1}{2} \left\{ -K_D + [\text{TAZ1}]_0 - [\text{HIF-OH}]_0 + \sqrt{(K_D - [\text{TAZ1}]_0 + [\text{HIF-OH}]_0)^2 + 4[\text{TAZ1}]_0 K_D} \right\}$$

### Simulation of $R_2$ dispersion profiles

$R_2$  dispersion profiles can be simulated using the same equations as used in the fitting. By varying [TAZ1]<sub>0</sub>, the TAZ1 concentration dependence of  $R_2^{\text{eff}}$  can be obtained, as shown in Figure 2a. For this simulation,  $1/\tau_{\text{CP}}$  was fixed to  $100 \text{ s}^{-1}$ , which corresponds to the first data point when  $R_2$  rates are measured with a constant relaxation delay of 40 ms. On the other hand, by varying  $1/\tau_{\text{CP}}$ , typical  $R_2$  dispersion profiles as shown in Figure 2b can be simulated.

Simulations were also performed for the pKID/KIX system, using the kinetic parameters derived previously from  $R_2$  dispersion experiments performed with KIX:pKID concentration ratios in the range 0.95-1.10.<sup>10</sup> The simulations confirm that concentration ratios near 1:1 represent the optimal stoichiometry for the pKID/KIX system (Fig. S5). Because the apparent association rate (average  $k_{\text{on}}^* = 6.3 \times 10^6 \text{ M}^{-1}\cdot\text{s}^{-1}$ ) is much slower than for binding of HIF-OH to TAZ1 ( $k_{\text{on}} = 1.3 \times 10^9 \text{ M}^{-1}\cdot\text{s}^{-1}$ ), exchange is too slow to contribute significantly to  $R_2$  relaxation under conditions of a large excess of pKID. In practical terms, KIX:pKID concentration ratios  $> 0.33$  would be required to give  $R_{\text{ex}} > 3$ , conditions under which the signal intensity of the free pKID resonances has been greatly reduced.

#### Reference List

- (1) Dames, S. A.; Martinez-Yamout, M.; De Guzman, R. N.; Dyson, H. J.; Wright, P. E. *Proc. Natl. Acad. Sci. U.S.A* **2002**, *99*, 5271-5276.
- (2) Grzesiek, S.; Bax, A. *J. Am. Chem. Soc.* **1993**, *115*, 12593-12594.
- (3) Marion, D.; Driscoll, P. C.; Kay, L. E.; Wingfield, P. T.; Bax, A.; Gronenborn, A. M.; Clore, G. M. *Biochemistry* **1989**, *28*, 6150-6156.
- (4) Grzesiek, S.; Bax, A. *J. Magn. Reson.* **1992**, *96*, 432-440.
- (5) Löhr, F.; Rüterjans, H. *J. Biomol. NMR* **1995**, *6*, 189-197.
- (6) Wittekind, M.; Mueller, L. *J. Magn. Reson.* **1993**, *101*, 201-205.
- (7) Loria, J. P.; Rance, M.; Palmer, A. G. *J. Am. Chem. Soc.* **1999**, *121*, 2331-2332.
- (8) Tollinger, M.; Skrynnikov, N. R.; Mulder, F. A.; Forman-Kay, J. D.; Kay, L. E. *J. Am. Chem. Soc.* **2001**, *123*, 11341-11352.
- (9) McElheny, D.; Schnell, J. R.; Lansing, J. C.; Dyson, H. J.; Wright, P. E. *Proc. Natl. Acad. Sci. U.S.A.* **2005**, *102*, 5032-5037.
- (10) Sugase, K.; Dyson, H. J.; Wright, P. E. *Nature* **2007**, *447*, 1021-1025.
- (11) Carver, J. P.; Richards, R. E. *J. Magn. Reson.* **1972**, *6*, 89-105.

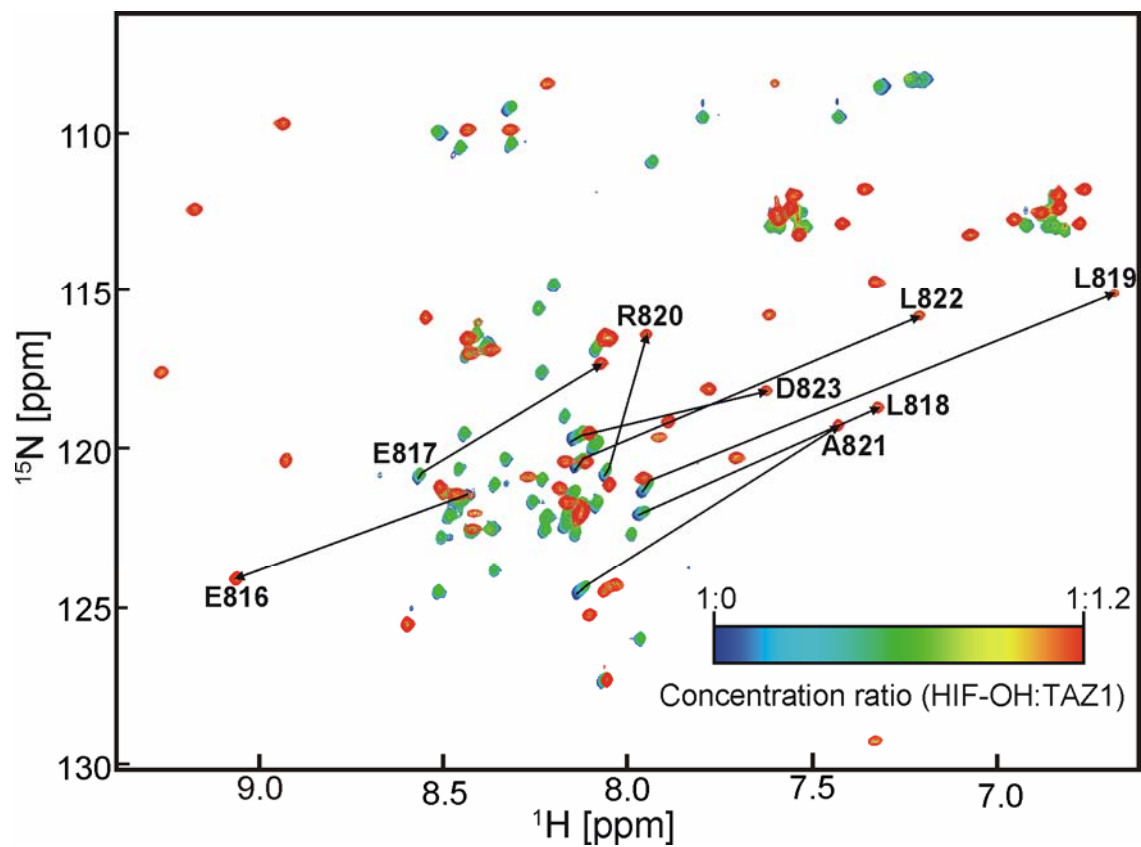

**Supplementary Figure S1.**  $^1\text{H}$ - $^{15}\text{N}$  HSQC titration of [ $^{15}\text{N}$ ]-HIF-OH with unlabeled TAZ1 over a HIF-OH:TAZ1 concentration ratios ranging from 1:0 to 1:1.2. The cross peaks are color coded from blue (free HIF-OH) through green to red (1:1.2).

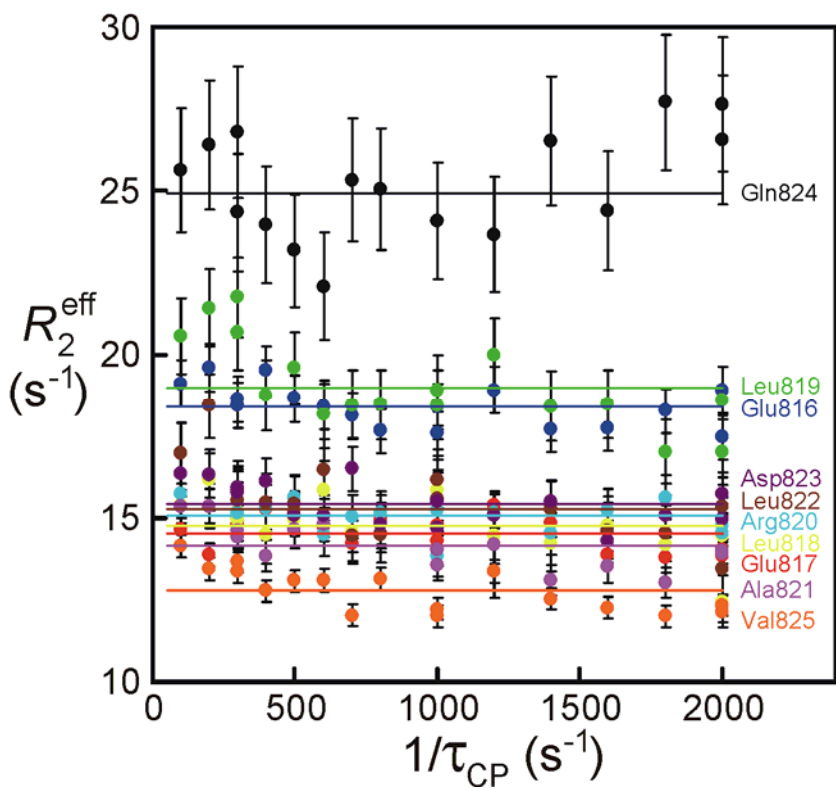

**Supplementary Figure S2.**  $R_2$  dispersion data recorded at 600 MHz for  $^{15}\text{N}$ -labeled HIF-OH in the complex with TAZ1 at 1:1 concentration ratio.

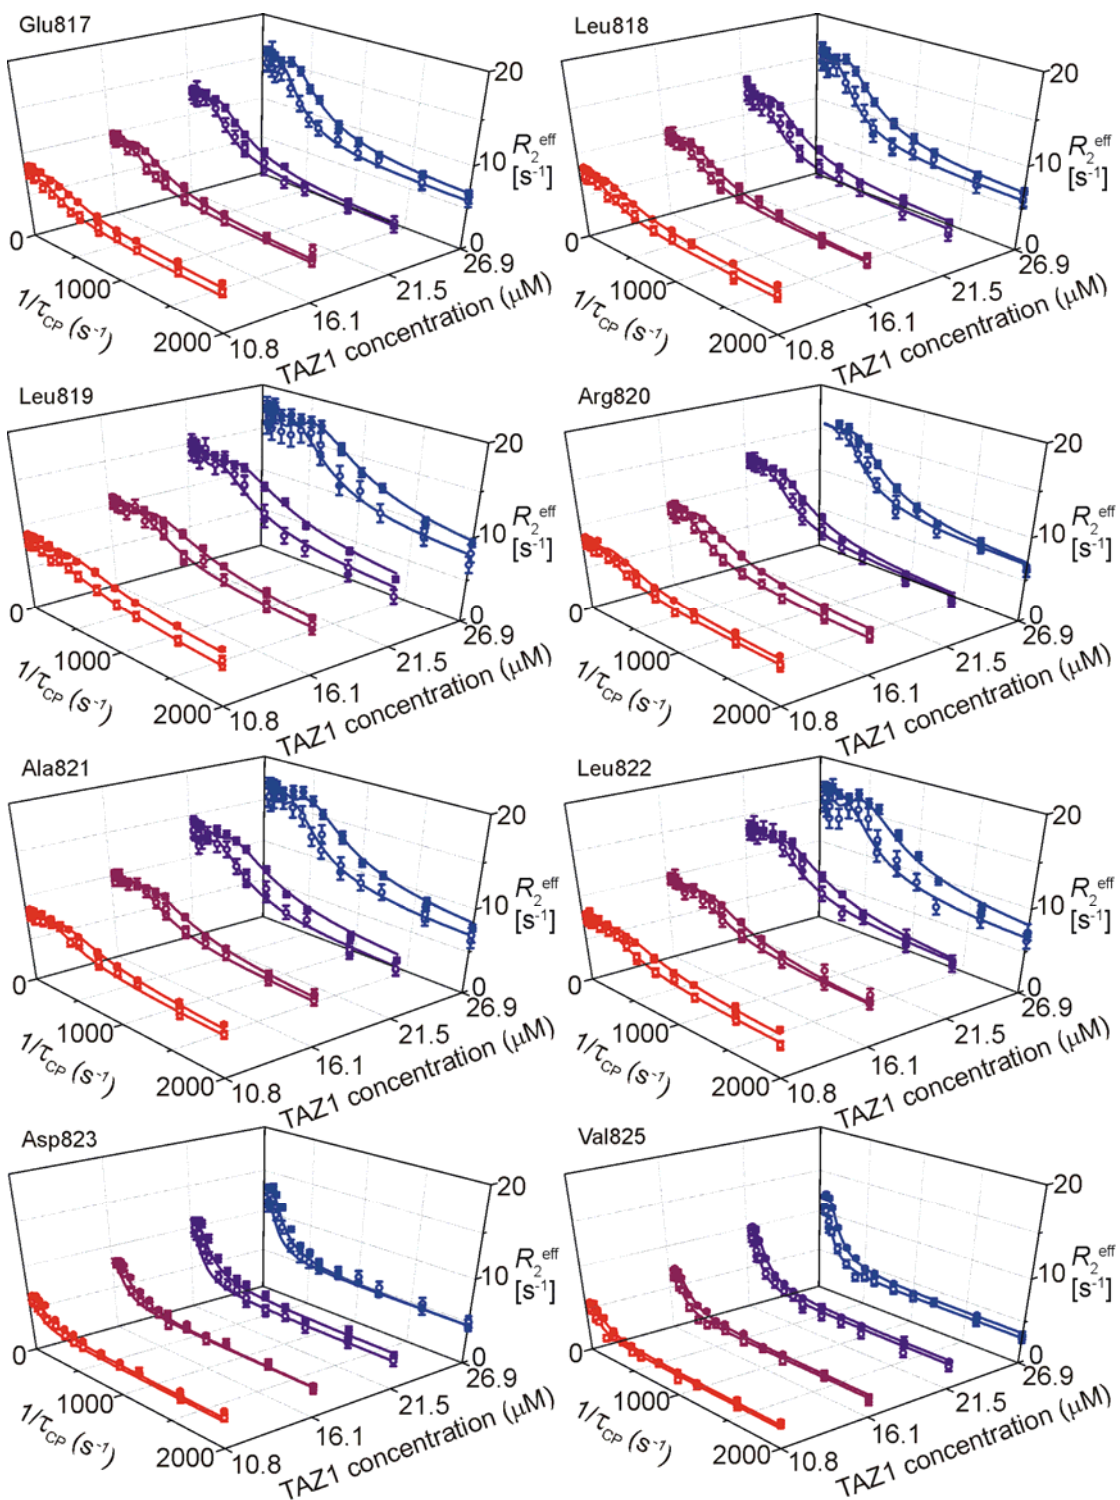

**Figure S3.** TAZ1 concentration dependence of  $^{15}\text{N}$   $R_2$  dispersion curves recorded at 900 MHz (filled circles) and 600 MHz (open circles). Dispersion curves for 505  $\mu\text{M}$   $^{15}\text{N}$ -HIF-OH in the presence of 10.8, 16.1, 21.5, and 26.9  $\mu\text{M}$  TAZ1 are shown.

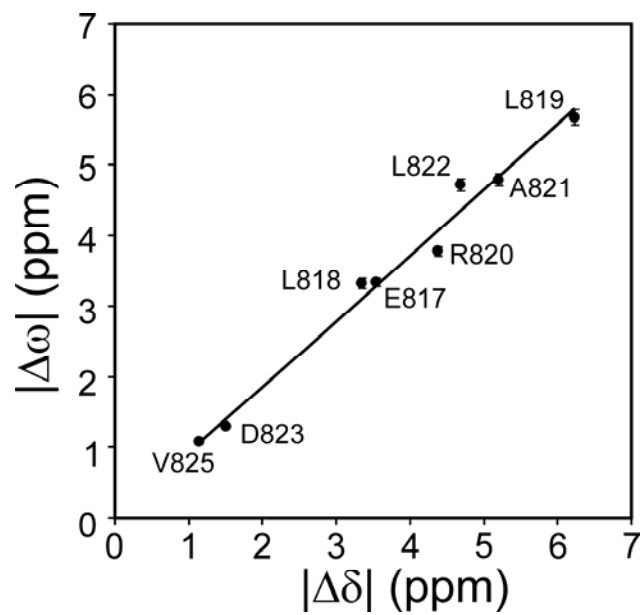

**Figure S4.** Correlation of  $^{15}\text{N}$  chemical shift differences,  $\Delta\omega$ , determined from the  $R_2$  dispersion measurements with equilibrium chemical shift differences,  $\Delta\delta$ , between free and TAZ1-bound HIF-OH. The slope is 0.93 ( $R^2 = 0.98$ ).



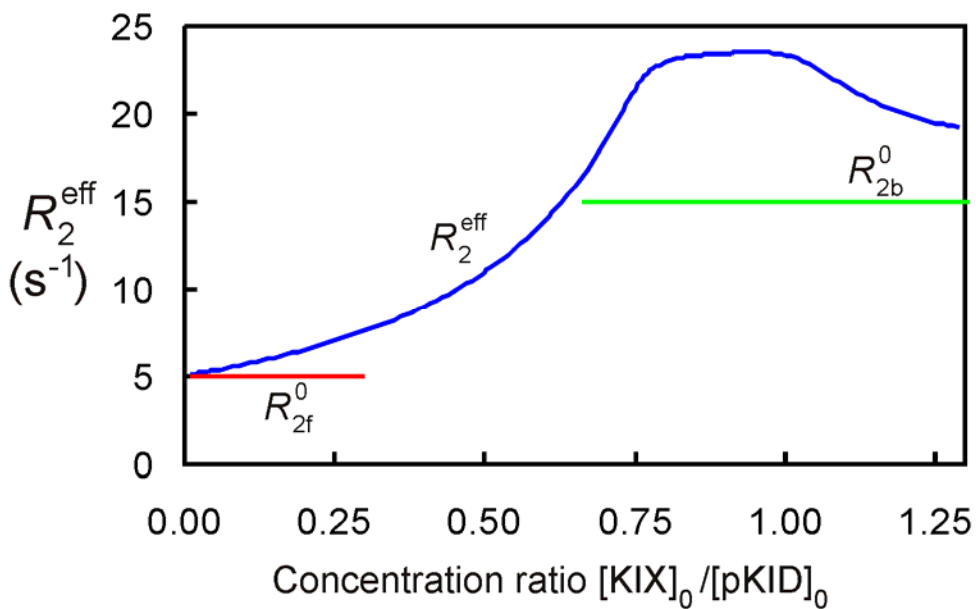

**Figure S5.**  $R_2^{\text{eff}}$  rates for pSer133 of pKID simulated using the parameters listed in Table 1 of ref. 10. The  $R_2^{\text{eff}}$  rates are plotted versus the concentration ratio,  $[\text{KIX}]_0/[\text{pKID}]_0$ . The red and green lines indicate  $R_2^0$ , where the  $R_2^0$  rates for the free and bound states are 5 and 15  $\text{s}^{-1}$ , respectively.
